# Supplementary material
Source: publisher figshare collection journal article supplement (https://acs.figshare.com/ndownloader/files/30746544)
Supplement: Supplementary file 1 [file 30746544]

## Supporting Information

# Earth-Abundant Fe and Ni Dually Doped Co<sub>2</sub>P for Superior Oxygen Evolution Reactivity and as Bifunctional Electrocatalyst Towards Renewable Energy Powered Overall Alkaline Water Splitting

Jiangtian Li,<sup>a,\*</sup> Deryn Chu,<sup>a</sup> David R. Baker,<sup>a</sup> Asher Leff,<sup>a</sup> Peng Zheng,<sup>b</sup> and Rongzhong Jiang<sup>a</sup>

*a* Sensors and Electron Devices Directorate, U. S Army Research Laboratory, 2800 Powder Mill Road, Adelphi, Maryland 20783, USA

*b* Department of Mechanical Engineering, Johns Hopkins University, Baltimore, MD 21218, USA

\* Corresponding author. Email: Jiangtian.li.ctr@army.mil.

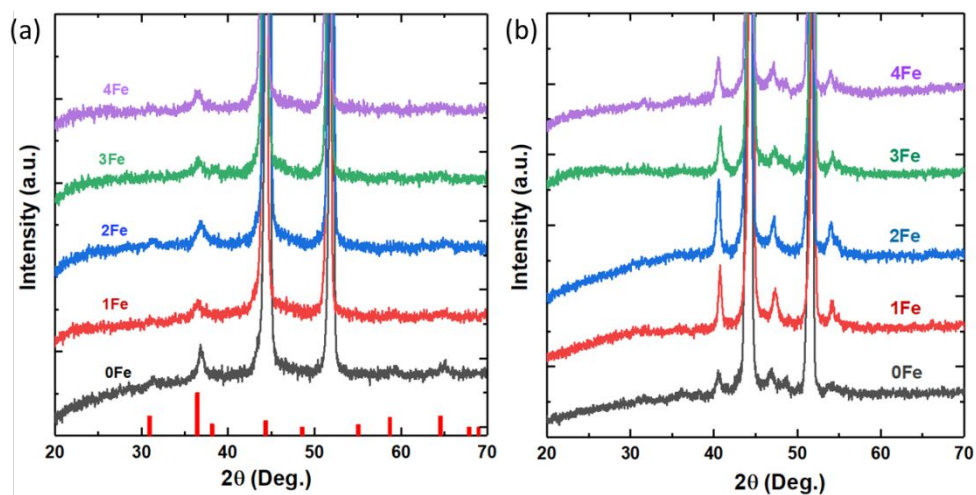

**Figure S1.** XRD patterns for (a) oxide and (b) phosphide samples with different Fe doping levels. Besides the NF background, the main phase in oxide is  $\text{Co}_3\text{O}_4$ , and in phosphide are  $\text{Co}_2\text{P}$  and  $\text{Ni}_2\text{P}$ , respectively. Please note that the  $\text{Ni}_2\text{P}$  phase appears owing to the phosphorization of the NF substrate, Here,  $x\text{Fe}$  ( $x=0, 1, 2, 3$  and  $4$ ) correspond to  $0, 0.1$  mmol,  $0.2$  mmol,  $0.3$  mmol and  $0.4$  mmol  $\text{FeCl}_3$  was added in the precursor solution, as described in Experimental Section.

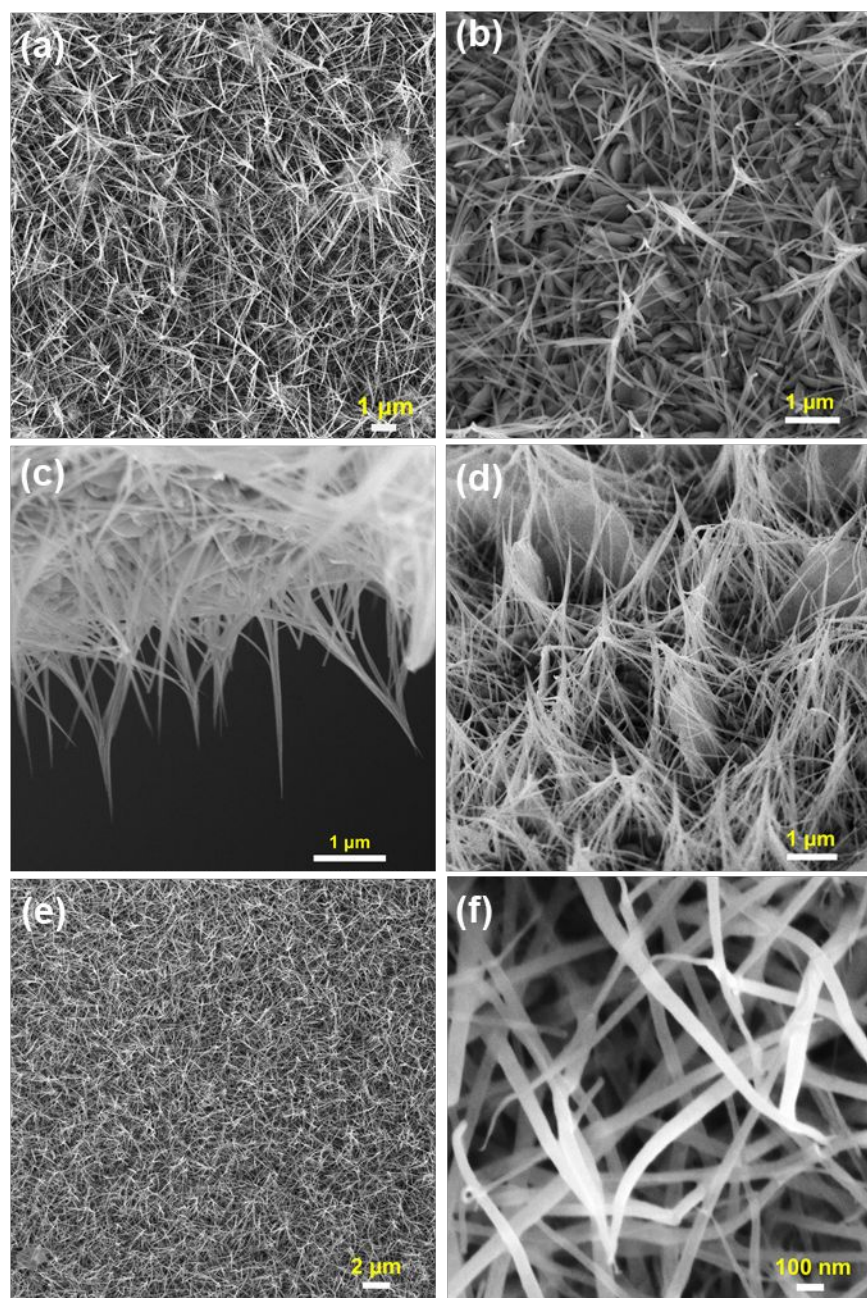

**Figure S2.** SEM images for (a) hydroxide precursor, (b,c) Ni-Co<sub>3</sub>O<sub>4</sub> nanowires on NF, (d) Ni-Co<sub>2</sub>P nanowire, and (e, f) FeNi-Co<sub>2</sub>P nanowires on NF, respectively.

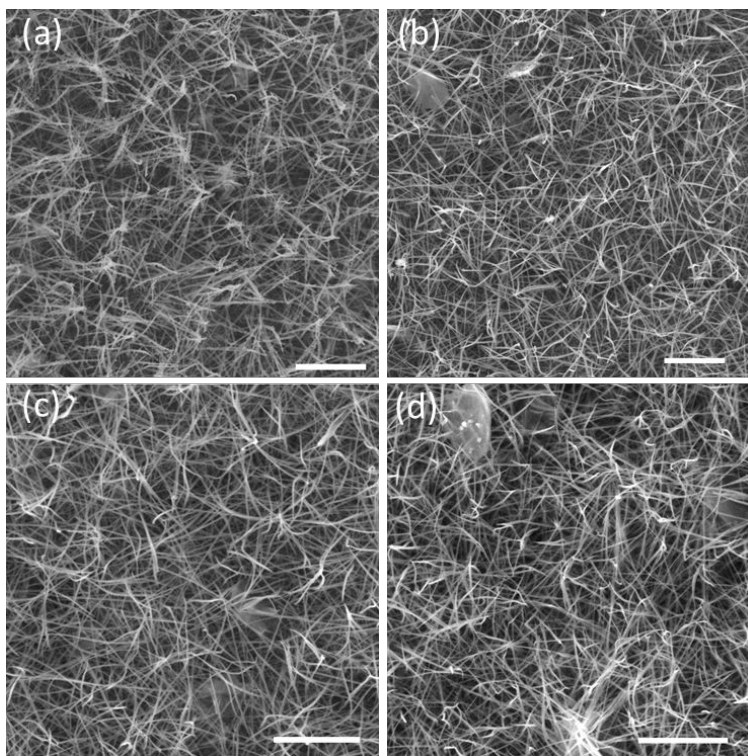

**Figure S3.** SEM images of for FeNi-Co<sub>3</sub>O<sub>4</sub> samples with different Fe doping levels, (a) 1FeNi-Co<sub>3</sub>O<sub>4</sub>, (b) 2FeNi-Co<sub>3</sub>O<sub>4</sub>, (c) 3FeNi-Co<sub>3</sub>O<sub>4</sub> and (d) 4FeNi-Co<sub>3</sub>O<sub>4</sub>, respectively. Here,  $x$ FeNi-Co<sub>3</sub>O<sub>4</sub> ( $x=1, 2, 3$  and  $4$ ) correspond to 0.1 mmol, 0.2 mmol, 0.3 mmol and 0.4 mmol FeCl<sub>3</sub> was added in the precursor solution, as described in Experimental Section.



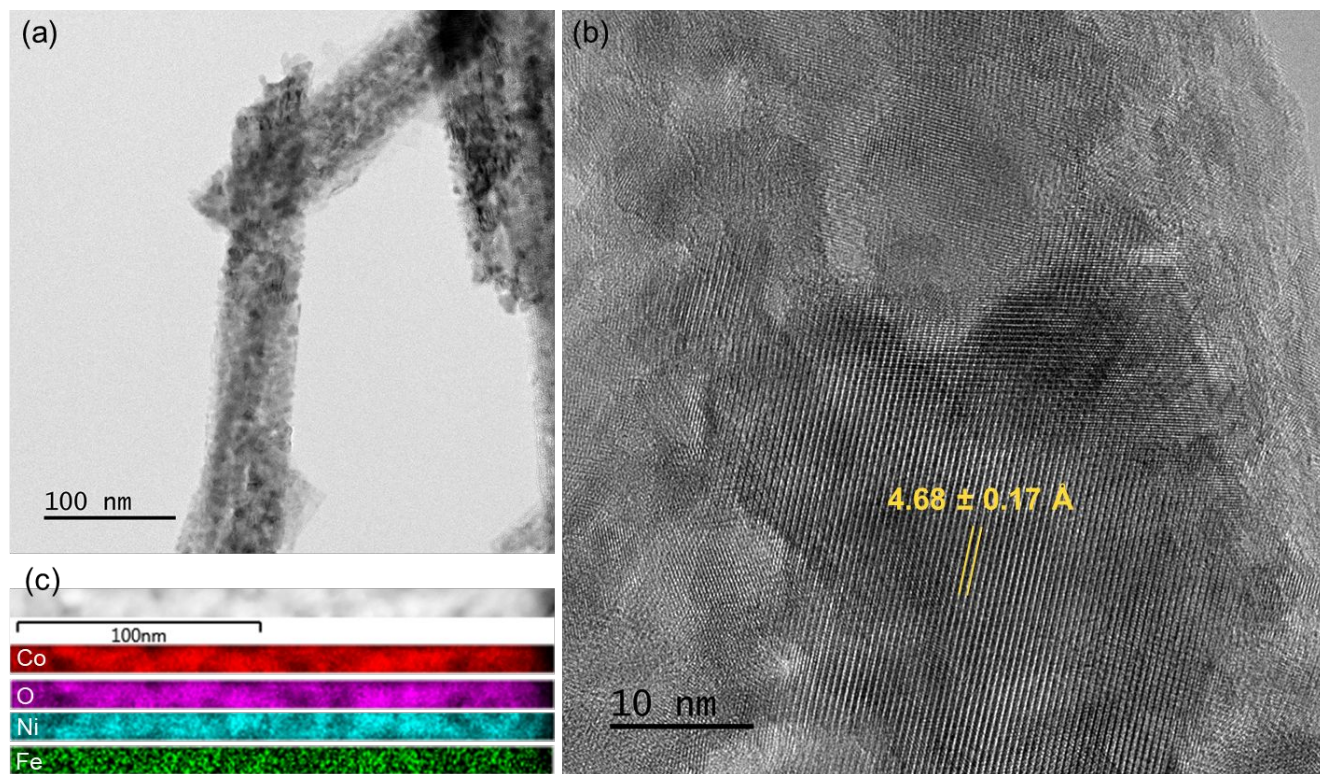

**Figure S4.** (a) TEM, (b) HRTEM and (c) EDX elements mapping of FeNi-Co<sub>3</sub>O<sub>4</sub> nanowire.

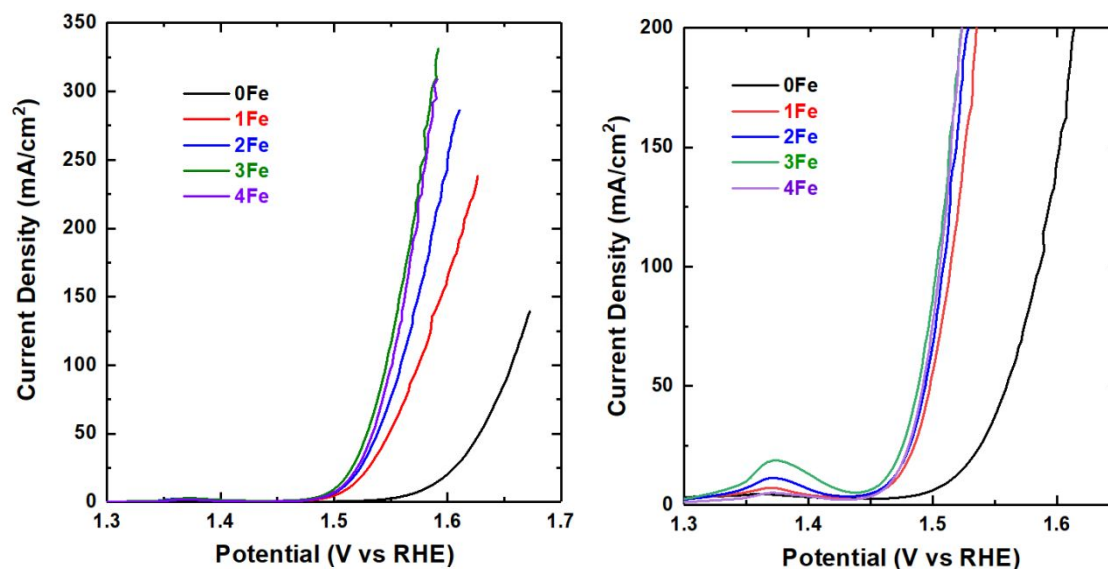

**Figure S5.** OER polarization curves for oxides (Left) and phosphides (Right) with different Fe doping levels, respectively.

As described for Figure S1,  $x\text{Fe}$  ( $x=0, 1, 2, 3$ , and  $4$ ) means Fe concentration in precursor solution is 0, 0.1 mmol, 0.2 mmol, 0.3 mmol, and 0.4 mmol. Of note, Fe incorporation into oxide  $\text{Ni-CO}_3\text{O}_4$  leads to a gradual improvement on OER with increasing Fe concentration, and then slight decreases for 4Fe sample. However, an abrupt boost was observed in phosphides upon Fe incorporation; OER substantially improved, and then showed limited effects with changing Fe concentrations. But it still can identify that 3Fe sample demonstrates the best activity. Therefore, in this study  $\text{FeNi-Co}_2\text{P}$  means the best OER catalyst 3Fe sample.

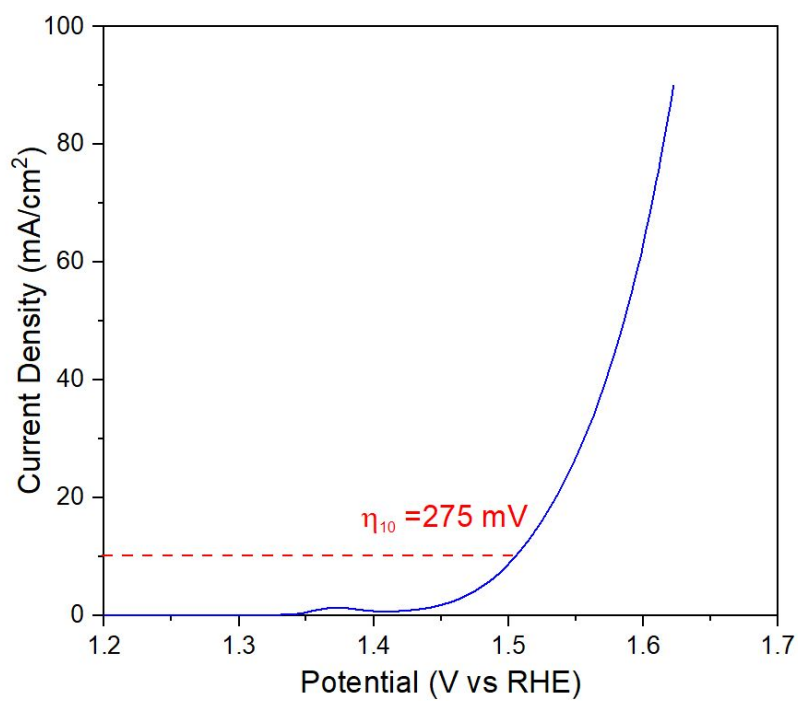

**Figure S6.** OER performance (polarization curve) for RuO<sub>2</sub> on NF measured in 1M KOH electrolyte.

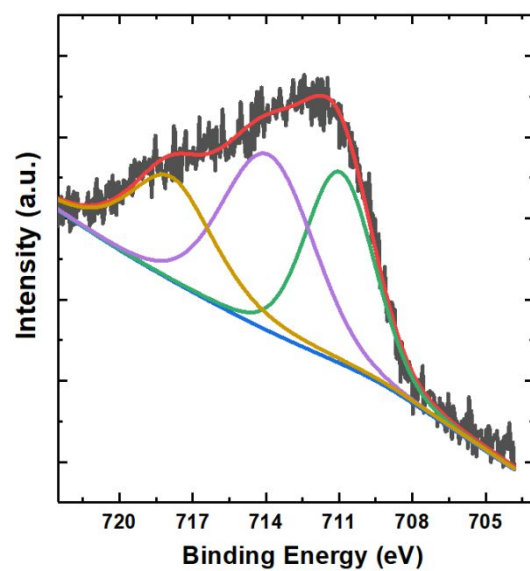

**Figure S7.** Fe 2p<sub>3</sub> XPS spectra for FeNi-Co<sub>2</sub>P sample after OER testing.



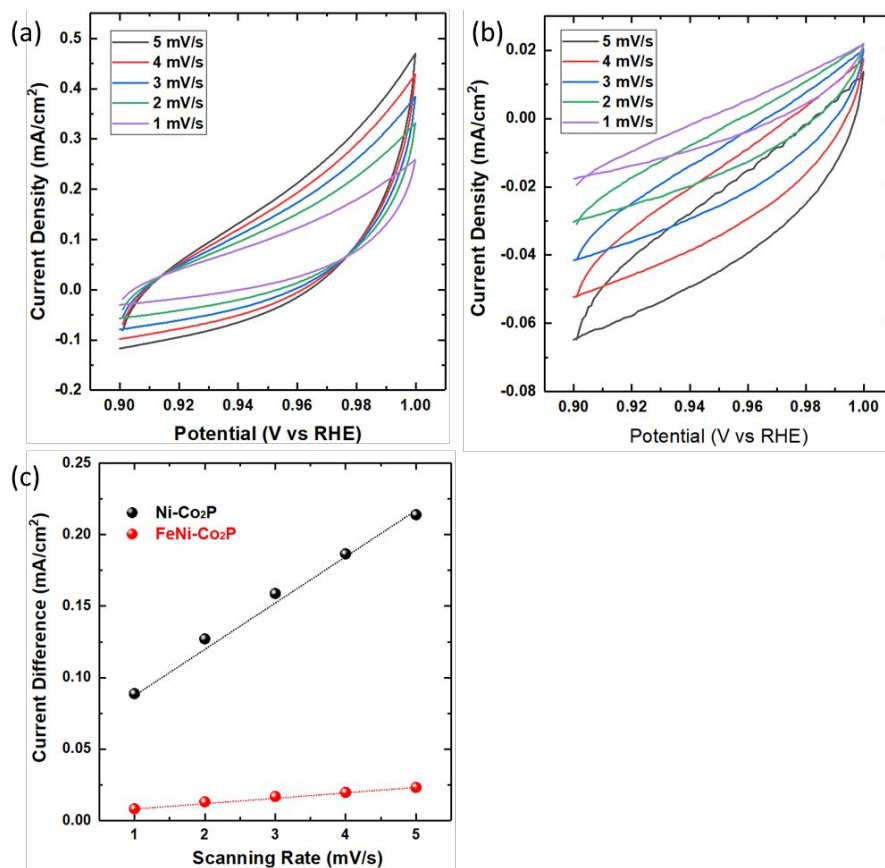

**Figure S8.** Cyclic voltammograms for Ni-Co<sub>2</sub>P (a) and FeNi-Co<sub>2</sub>P (b) electrodes with different scanning rates within the potential range 0.9 V ~ 1.0 V vs RHE. (c) The difference in capacitive current density at 0.95 V vs RHE was plotted against the scanning rate.

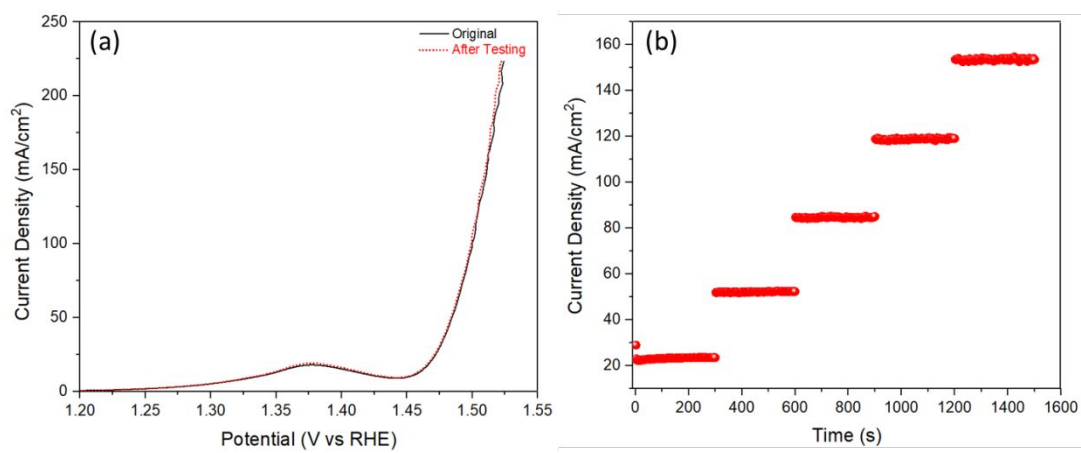

**Figure S9.** The OER polarization curves (a) for FeNi-Co<sub>2</sub>P electrode before and after the multiple step chronoamperometry scanning (b) in 1M KOH electrolyte.

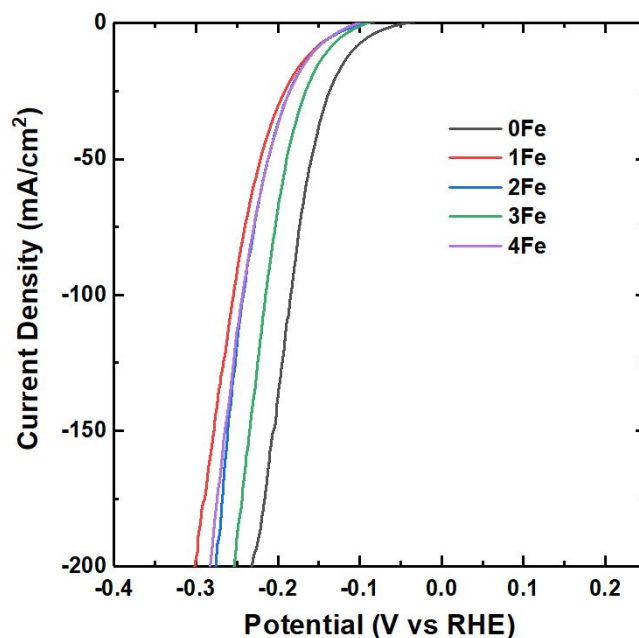

**Figure S10.** The HER polarization curves for  $x\text{FeNi-Co}_2\text{P}$  ( $x=0, 1, 2, 3$ , and  $4$ ) electrocatalysts in 1M KOH electrolyte.

In this study, Fe incorporation degrades the HER activity in terms of the onset potential.  $0\text{FeNi-Co}_2\text{P}$  has an onset potential of  $-51\text{ mV}$ , whereas all Fe incorporation samples demonstrate the same onset potential of  $-96\text{ mV}$ . No clear relationship between Fe doping levels and  $\eta_{10}$  (overpotential at the current density of  $10\text{ mA/cm}^2$ ) was identified. Based on XPS and VBS analysis, Fe incorporation in this study leads to the decreased density of states (electrons) near the Fermi level, which lowers the charge transfer efficiency under alkaline HER conditions and thus worsens the HER activity of Fe-containing samples.

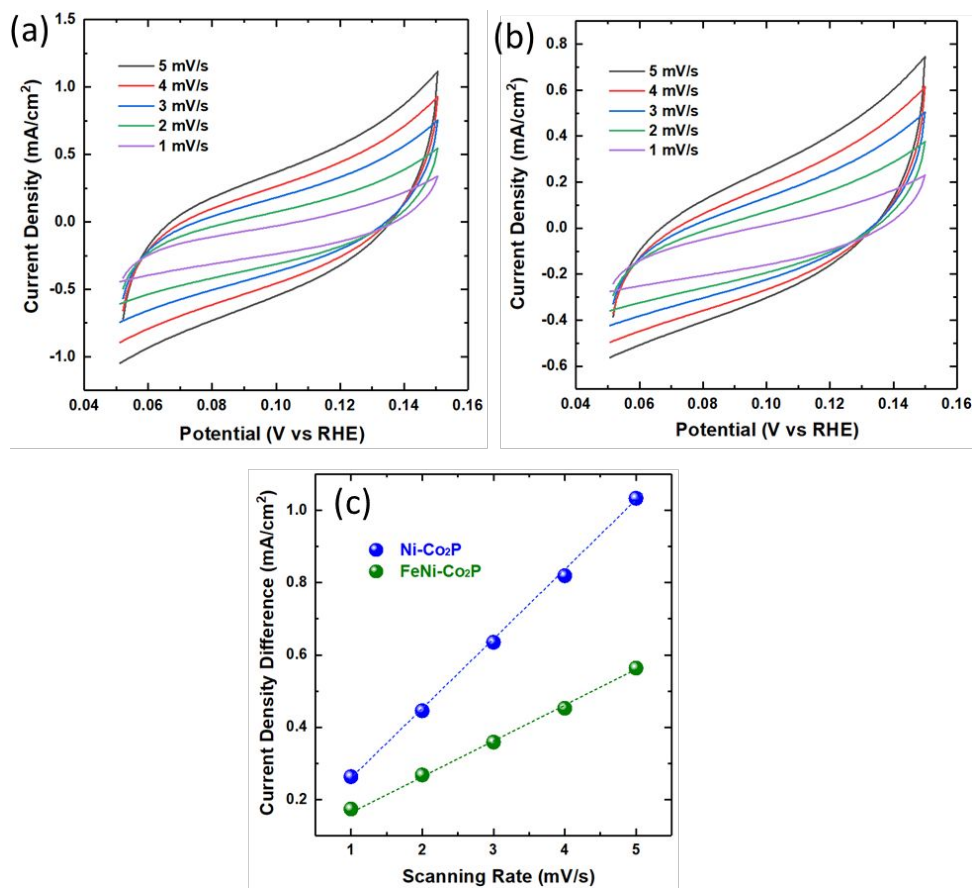

**Figure S11.** Cyclic voltammograms for Ni-Co<sub>2</sub>P (a) and FeNi-Co<sub>2</sub>P (b) electrodes with different scanning rates within the potential range 0.05 V ~ 0.15 V vs RHE. (c) The difference in capacitive current density at 0.1 V vs RHE was plotted against the scanning rate.

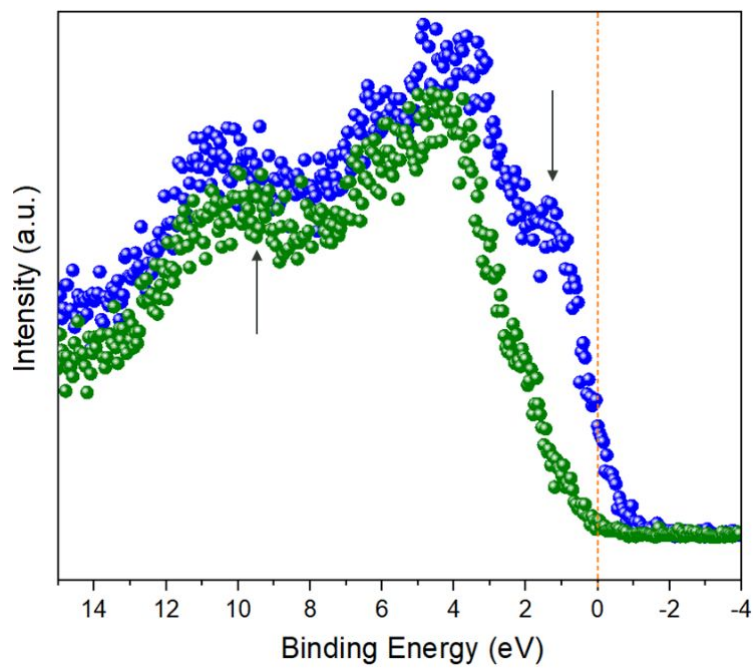

**Figure S12.** XPS valence band spectra (VBS) for Ni-Co<sub>2</sub>P (Blue) and FeNi-Co<sub>2</sub>P (Green) electrodes.

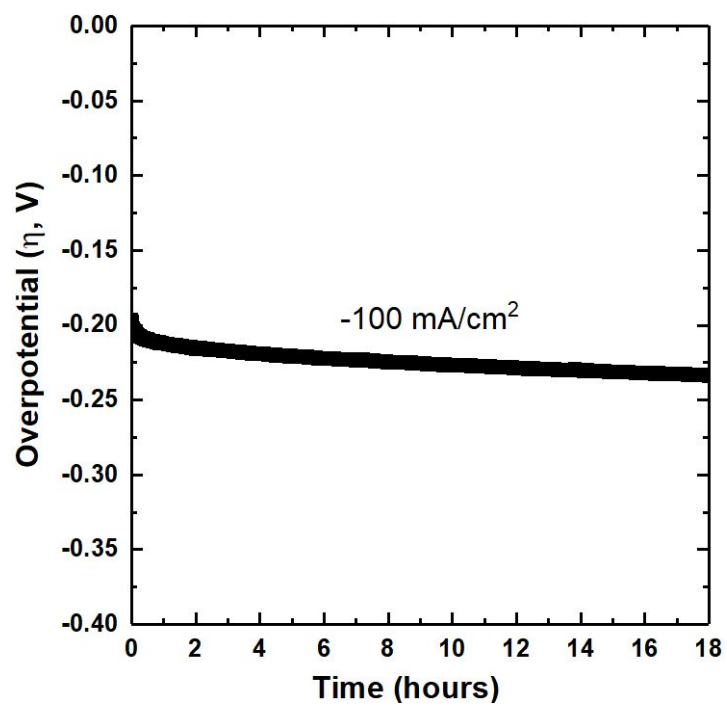

**Figure S13.** Chronopotentiometry scanning of Ni-Co<sub>2</sub>P electrode at  $-100 \text{ mA/cm}^2$  for 18 hours under alkaline HER condition in 1M KOH.



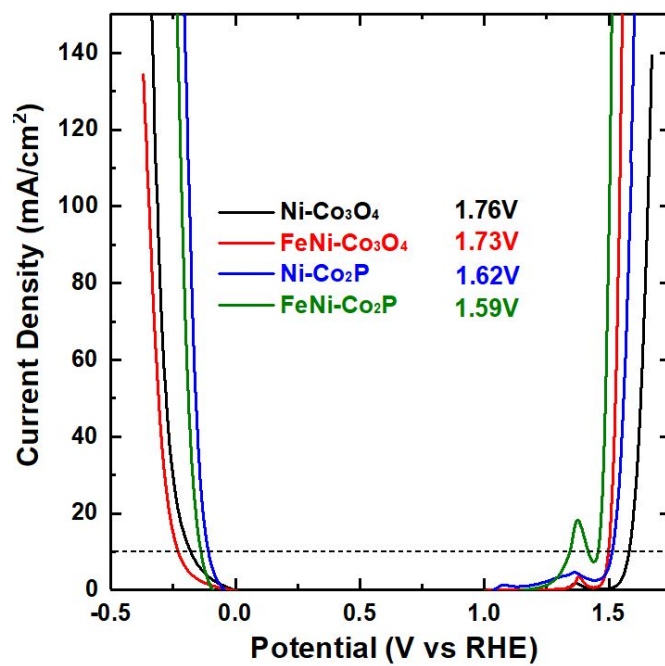

**Figure S14.** Theoretical overall water splitting by coupling the HER and OER polarization curves obtained in a three-electrode configuration half-cell.

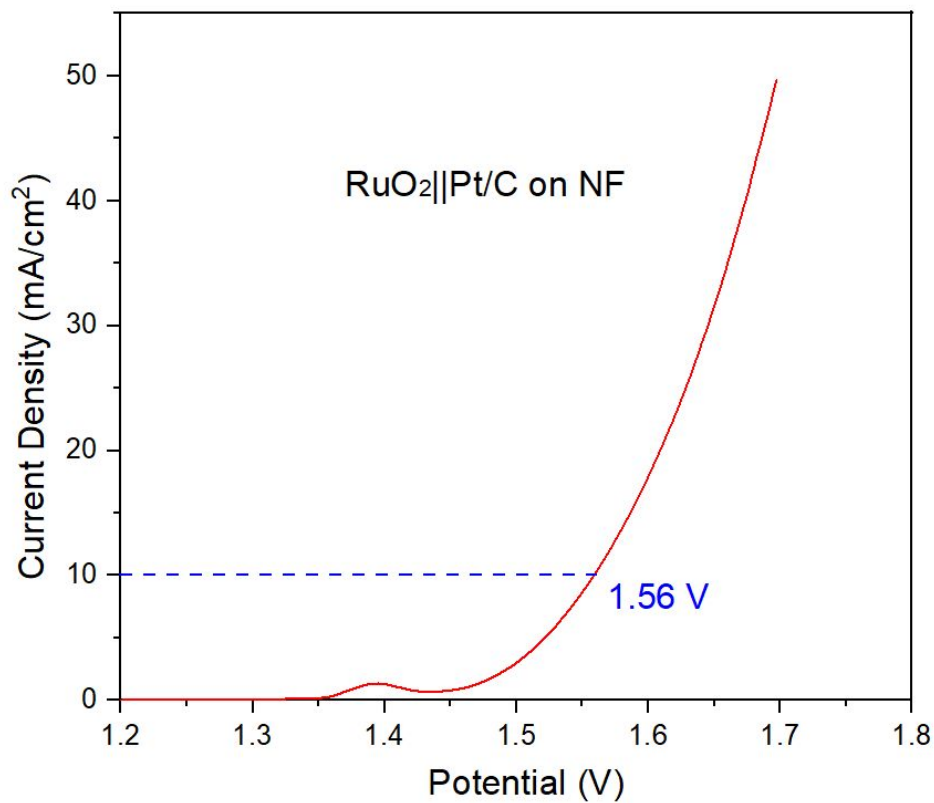

**Figure S15.** LSV curve for RuO<sub>2</sub>||Pt/C electrolyzer cell in 1M KOH electrolyte. The electrocatalysts were loaded on NF. This value is comparable to the reported values on RuO<sub>2</sub>||Pt/C or IrO<sub>2</sub>||Pt/C electrolyzer cell.

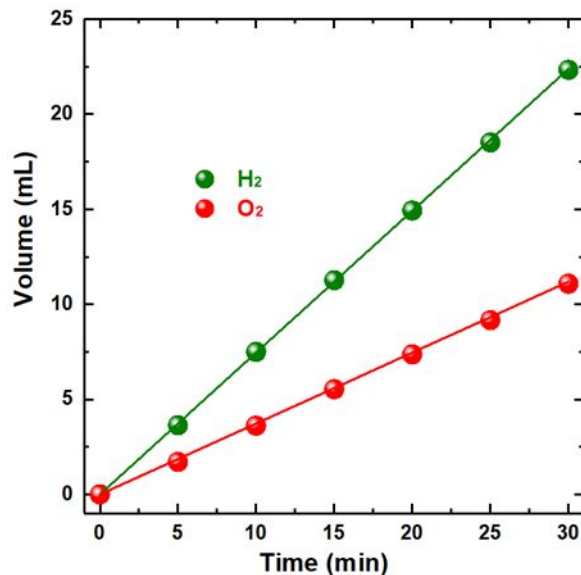

**Figure S16.** The spots represent H<sub>2</sub> and O<sub>2</sub> volumes experimentally measured by drainage gas collection method every 5 mins for total 30 mins at a constant current of 100 mA. The lines correspond to theoretical volumes for H<sub>2</sub>/O<sub>2</sub>.

### ***Faradaic Efficiency calculation***

To calculate the faradaic efficiency, H<sub>2</sub> and O<sub>2</sub> volumes were experimentally measured by drainage gas collection method every 5 mins for total 30 mins at a constant current of 100 mA. Whereas the theoretical volumes of H<sub>2</sub> and O<sub>2</sub> are calculated using the following equation:

$$F = e \cdot N_A$$

$$n = \frac{N}{N_A} = \frac{V}{V_m}$$

$$Q = I \cdot t$$

$F$  is Faraday's constant (96485.33 C mol<sup>-1</sup>);  $e$  is elementary charge (1.6×10<sup>-19</sup> C);  $N_A$  is Avogadro constant (6.2×10<sup>23</sup>);  $n$  is the amount of substance (mol);  $N$  is the number of particles;  $V$  is the gas volume (L);  $V_m$  is the molar volume of gas at the temperature when performing experiment (in our study  $V_m = 24.0$  L mol<sup>-1</sup> at 20 °C);  $Q$  is quantity of electric charge (C);  $I$  is current (A);  $t$  is time (s).

Accordingly,

$$V_{H_2} = \frac{12 \cdot I \cdot t}{96485.33}$$

$$V_{O_2} = \frac{6 \cdot I \cdot t}{96485.33}$$

Eventually, the Faraday efficiency is estimated by comparing the experimental volume with the theoretical one. [S56]

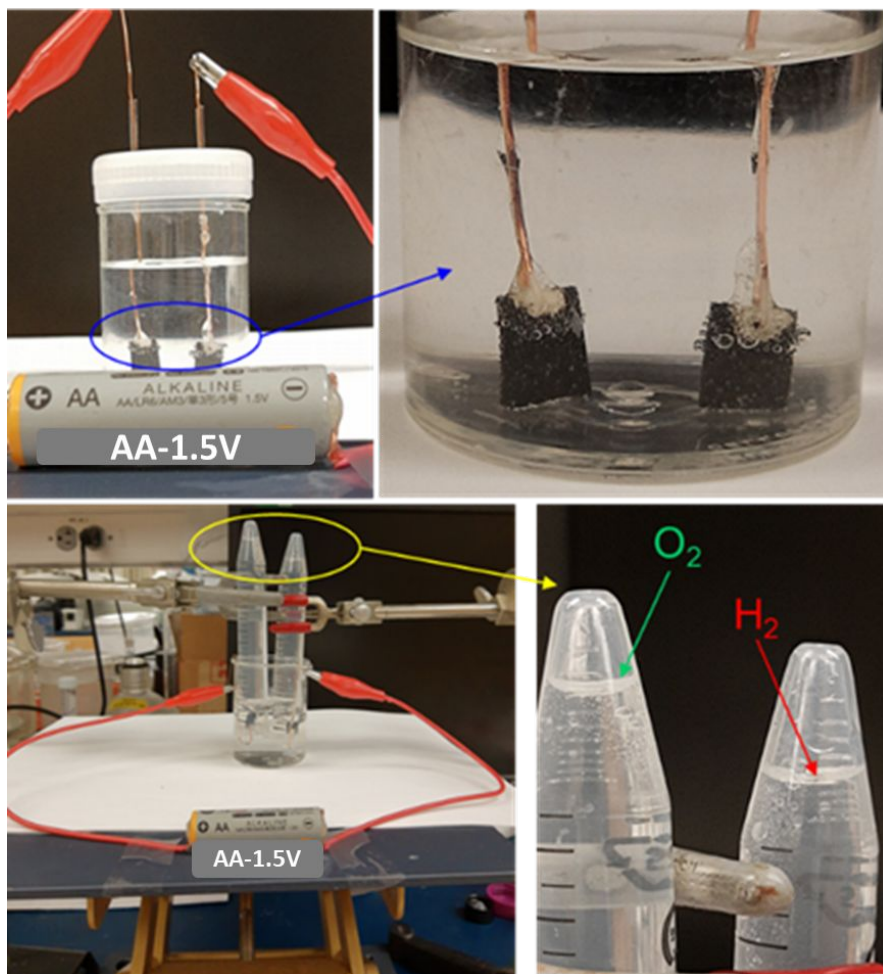

**Figure S17.** Setup for 1.5V AA battery driven overall water splitting, and the collection of generated gases with water replacement method.

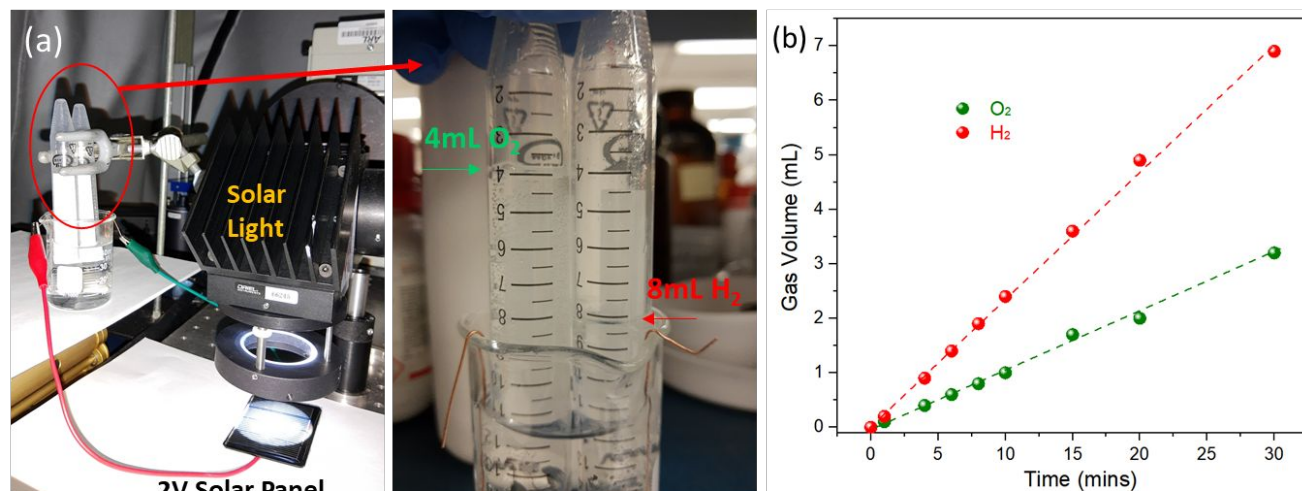

**Figure S18.** (a) set-up for the solar energy powered water splitting with a standard solar light simulator and 2V-solar panel. (b) shows the volumes of H<sub>2</sub> and O<sub>2</sub> against time with the PV-EC setup.

### ***Calculation of solar-to-hydrogen conversion efficiency***

The solar-to-hydrogen conversion efficiency could be calculated based on the standard molar enthalpy of combustion (-285 kJ/mol),

$$\eta = \frac{\text{standard molar enthalpy of combustion (kJ/mol)} \times H_2(\text{mol})}{\text{illumination power (W)} \times \text{time(s)}}$$

where the illumination power is around 100 mW/cm<sup>2</sup> generated by a standard sunlight simulator with an AM1.5G filter; the energy of H<sub>2</sub> was obtained according to the standard molar enthalpy of combustion (-285 kJ/mol). [S57]



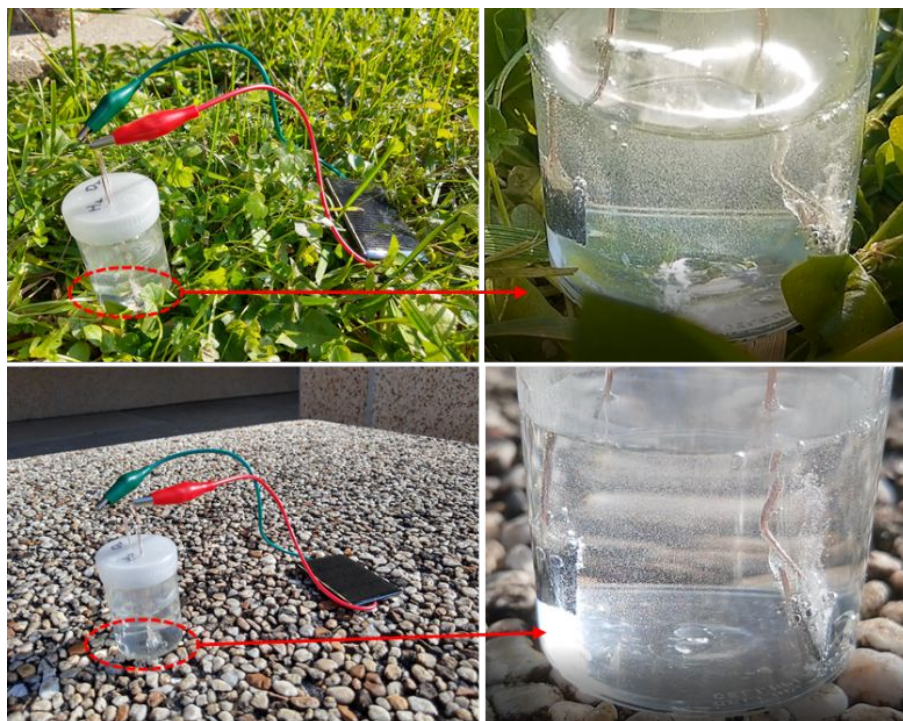

**Figure S19.** Outdoor Solar light powered overall water splitting for hydrogen and oxygen evolutions.

**Table S1.** Summary of the metrics of OER performance for oxides and phosphides.

| Samples                             | $\eta_{10}$<br>(mV) | $\eta_{100}$<br>(mV) | Tafel<br>(mV/dec) | $j_{1.5V \text{ vs RHE}}$<br>(mA/cm <sup>2</sup> ) | $R_{CT}$<br>( $\Omega$ ) |
|-------------------------------------|---------------------|----------------------|-------------------|----------------------------------------------------|--------------------------|
| Ni-Co <sub>3</sub> O <sub>4</sub>   | 350                 | 426                  | 74.6              | 0.7                                                | 7.11                     |
| FeNi-Co <sub>3</sub> O <sub>4</sub> | 268                 | 312                  | 47.3              | 10.8                                               | 1.07                     |
| Ni-Co <sub>2</sub> P                | 282                 | 356                  | 64.8              | 6.3                                                | 4.02                     |
| FeNi-Co <sub>2</sub> P              | 225 $\pm$ 4         | 270                  | 42.8              | 96.2                                               | 0.81                     |

**Table S2.** Summary of the metrics of HER performance for oxides and phosphides.

| Samples                             | $\eta_{10}$ (mV) | $\eta_{100}$ (mV) | Tafel Slope (mV/dec) | $R_{CT}$ ( $\Omega$ ) |
|-------------------------------------|------------------|-------------------|----------------------|-----------------------|
| Ni-Co <sub>3</sub> O <sub>4</sub>   | 181              | 314               | 107.1                | 6.29                  |
| FeNi-Co <sub>3</sub> O <sub>4</sub> | 231              | 346               | 122.8                | 7.94                  |
| Ni-Co <sub>2</sub> P                | 109              | 185               | 77.6                 | 1.78                  |
| FeNi-Co <sub>2</sub> P              | 139              | 215               | 82.4                 | 2.04                  |
| Pt/C                                | 42               | 165               | 57.8                 | 0.98                  |

**Table S3.** Comparison of overpotentials to reach the current densities of 10 and 100 mA/cm<sup>2</sup> for OER in 1M KOH alkaline electrolyte.

| Samples                                                                 | $\eta$ (mV)      | Tafel Slope (mV/dec) | Reference |
|-------------------------------------------------------------------------|------------------|----------------------|-----------|
| NiCoP@NiMn-LDH on NF                                                    | 293@100          | 43.7                 | S1        |
| NiCo <sub>2</sub> S <sub>4</sub> on NF                                  | 260              | 40.1                 | S2        |
| Mo-doped CoP nanoarrays                                                 | 305              | 56                   | S3        |
| Fe-doped CoNi <sub>0.5</sub> P Hierarchical Arrays                      | 344@100          | 82                   | S4        |
| Hierarchical Co-Fe Oxyphosphide                                         | 280              | 53                   | S5        |
| N-doped Ni-Co phosphide                                                 | 225              | 66.9                 | S6        |
| Fe-doped Co-Mo-S microtube                                              | 268              | 79.3                 | S7        |
| CoP(MoP)-CoMoO <sub>3</sub> @CN                                         | 296              | 105                  | S8        |
| Cobalt phosphide hollow nanoboxes                                       | 240              | 45.8                 | S9        |
| np-(Ni <sub>0.67</sub> Fe <sub>0.33</sub> ) <sub>4</sub> P <sub>5</sub> | 245              | 32.9                 | S10       |
| NiCo <sub>2</sub> O <sub>4</sub> /NiCoP heterostructure                 | 295              | 70                   | S11       |
| Co-P@Porous Carbon                                                      | 280              | 53                   | S12       |
| Cr-Doped FeNi-P Nanoparticles                                           | 240              | 72.36                | S13       |
| Mo-doped Ni <sub>2</sub> P Hollow Nanostructures                        | 270              | 68.5                 | S14       |
| W-Doped CoP Nanoneedle Arrays                                           | 252              | 74                   | S15       |
| Ru-NiFe-P nanosheets                                                    | 242              | 66.1                 | S16       |
| Cobalt phosphide nanowire arrays                                        | 300              | 64                   | S17       |
| CoFe-P/NF                                                               | 250              | 35                   | S18       |
| Ni-Co/Ni-Fe phosphides                                                  | 251              | 56                   | S19       |
| Mo-Doped NiCoP Nanosheet Arrays                                         | 269              | 76.7                 | S20       |
| Cobalt–iron bimetal phosphide                                           | 297              | 48                   | S21       |
| Cobalt phosphosulfide                                                   | 308              | 58                   | S22       |
| Fe-Doped Ni-Co Phosphide Nanoplates                                     | 293              | 37.8                 | S23       |
| Hollow Fe-Co-P alloy nanostructures                                     | 252              | 33                   | S24       |
| NiFeP@C                                                                 | 260              | 38.7                 | S25       |
| FeNi-Doped Co <sub>2</sub> P on NF                                      | 225±4<br>270@100 | 42.8                 | This work |

**Table S4.** Comparison of overpotential  $\eta_{10}$  to reach the current densities of mA/cm<sup>2</sup> in an electrolyzer cell for water splitting in 1M KOH alkaline electrolyte.

| Samples                                                                                     | $\eta_{10}$ (V) | References |
|---------------------------------------------------------------------------------------------|-----------------|------------|
| Co <sub>3</sub> O <sub>4</sub> Nanolayer-Shelled CoWP Nanowire Array                        | 1.61            | S26        |
| Fe-doped CoNi <sub>0.5</sub> P Hierarchical Arrays                                          | 1.61            | S4         |
| Hierarchical Co-Fe Oxyphosphide                                                             | 1.69            | S5         |
| N-doped FeP nanorods from MOF                                                               | 1.72 V @100     | S27        |
| Cobalt phosphide on Ti mesh                                                                 | 1.64            | S28        |
| Hierarchical Fe-MoS <sub>2</sub> /Ni <sub>3</sub> S <sub>2</sub> /nickel foam               | 1.6             | S29        |
| Iron/nickel phosphides hybrid on Ni Foam                                                    | 1.567           | S30        |
| np-(Ni <sub>0.67</sub> Fe <sub>0.33</sub> ) <sub>4</sub> P <sub>5</sub>                     | 1.62            | S10        |
| NiCo <sub>2</sub> O <sub>4</sub> /NiCoP heterostructure                                     | 1.66            | S11        |
| Cobalt phosphides in P-doped carbon (Co-P@PC)                                               | 1.60            | S12        |
| Ni <sub>3</sub> S <sub>2</sub> -Ni <sub>2</sub> P/NF                                        | 1.58            | S31        |
| Cobalt phosphide nanoparticles                                                              | 1.58            | S32        |
| Nanoporous Ni-Fe-P                                                                          | 1.61            | S33        |
| Iron-doped nickel phosphide nanosheet arrays                                                | 1.61            | S34        |
| Ni <sub>2</sub> P Sheets on NiCo <sub>2</sub> O <sub>4</sub> Nanocone Arrays                | 1.59            | S35        |
| Bimetallic phosphide (NiFe-P)                                                               | 1.60            | S36        |
| 0.75-NC-Fe <sub>x</sub> P catalyst                                                          | 1.63            | S37        |
| NiFe-NiCoO <sub>2</sub> hollow polyhedron                                                   | 1.67            | S38        |
| Ni(OH) <sub>2</sub> /NiCo <sub>2</sub> O <sub>4</sub> heterojunctions                       | 1.65            | S39        |
| FeNiCo@NC/NF self-supported electrodes                                                      | 1.61            | S40        |
| Tungsten-Doped CoP Nanoneedle Arrays                                                        | 1.59            | S15        |
| Cobalt phosphide nanowire arrays                                                            | 1.62            | S17        |
| Co <sub>9</sub> S <sub>8</sub> /WS <sub>2</sub> array films                                 | 1.65            | S41        |
| CoFe-P/NF                                                                                   | 1.51            | S18        |
| 3D CuCo <sub>2</sub> S <sub>4</sub> /NiCo <sub>2</sub> S <sub>4</sub> core-shell composites | 1.6             | S42        |
| 2D/0D CoP integrated in MOF                                                                 | 1.59            | S43        |
| Ni-Co/Ni-Fe phosphides                                                                      | 1.63            | S19        |
| Mn-doped FeP/Co <sub>3</sub> (PO <sub>4</sub> ) <sub>2</sub> Nanosheet Arrays               | 1.61            | S44        |
| Self-Standing CoP Nanosheets Array                                                          | 1.65            | S45        |
| Mo-Doped NiCoP Nanosheet Arrays                                                             | 1.61            | S20        |

|                                                                             |         |            |
|-----------------------------------------------------------------------------|---------|------------|
| Cobalt–iron bimetal phosphide                                               | 1.57    | S21        |
| Co <sub>2</sub> P nanoparticles into co-doped carbon                        | 1.72    | S46        |
| Ternary (Ni <sub>x</sub> Fe <sub>y</sub> ) <sub>2</sub> P nanoplates arrays | 1.61    | S47        |
| C-CoP hollow microporous nanocages                                          | 1.65    | S48        |
| Co <sub>2</sub> P/Mo <sub>2</sub> C/Mo <sub>3</sub> Co <sub>3</sub> C@C     | 1.74    | S49        |
| Ternary NiCoP nanosheet arrays                                              | 1.77@50 | S50        |
| MoP Nanoflake Array Supported on Ni Foam                                    | 1.62    | S51        |
| CoP Nanoframes                                                              | 1.65    | S52        |
| CoP@ZnFeP                                                                   | 1.6     | S53        |
| NiCoP@phosphate nanocages                                                   | 1.6     | S54        |
| CoVP@CC                                                                     | 1.61    | S55        |
| Fe-Doped Ni-Co Phosphide Nanoplates                                         | 1.61    | S23        |
| FeNi-Co <sub>2</sub> P  FeNi-Co <sub>2</sub> P                              | 1.596   | this study |
| Ni-Co <sub>2</sub> P  Ni-Co <sub>2</sub> P                                  | 1.625   | this study |
| FeNi-Co <sub>2</sub> P  Ni-Co <sub>2</sub> P                                | 1.578   | this study |

## References

- S1. P. Wang, J. Qi, X. Chen, C. Li, W. Li, T. Wang, C. Liang. Three-Dimensional Heterostructured NiCoP@NiMn-Layered Double Hydroxide Arrays Supported on Ni Foam as a Bifunctional Electrocatalyst for Overall Water Splitting. *ACS Appl. Mater. Interfaces* **2020**, 12, 4385-4395.
- S2. Sivanantham, A.; Ganesan, P.; Shanmugam, S. Hierarchical NiCo<sub>2</sub>S<sub>4</sub> Nanowire Arrays Supported on Ni Foam: An Efficient and Durable Bifunctional Electrocatalyst for Oxygen and Hydrogen Evolution Reactions. *Adv. Funct. Mater.*, **2016**, 26, 4661-4672.
- S3. Guan, C.; Xiao, W.; Wu, H.; Liu, X.; Zang, W.; Zhang, H.; Ding, J.; Feng, Y. P.; Pennycook, S. J.; Wang, J. Hollow Mo-doped CoP nanoarrays for efficient overall water splitting. *Nano Energy* **2018**, 48, 73-80.
- S4. W. Zhang, G. Chen, J. Zhao, J. Liang, G. Liu, B. Ji, L. Sun. Fe-doped CoNi<sub>0.5</sub>P Hierarchical Arrays as Efficient Bifunctional Electrocatalysts for Overall Water Splitting: Evolution of Morphology and Coordination of Catalytic Performance. *ChemistrySelect* **2019**, 4, 6744-6752.
- S5. P. Zhang, X. F. Lu, J. Nai, S. Zang, X. W. Lou. Construction of Hierarchical Co-Fe Oxyphosphide Microtubes for Electrocatalytic Overall Water Splitting. *Adv. Sci.* **2019**, 1900576.



- S6. R. Zhang, J. Huang, G. Chen, W. Chen, C. Song, C. Li, K. Ostrikov. In situ engineering bi-metallic phospho-nitride bi-functional electrocatalysts for overall water splitting. *Applied Catalysis B: Environmental*, **2019**, 254 414-423.
- S7. F. Yuan, Z. Liu, G. Qin, Y. Ni. Fe-doped Co-Mo-S microtube: A highly efficient bifunctional electrocatalyst for overall water splitting in alkaline solution. *Dalton Trans.*, **2020**, 49, 15009-15022.
- S8. L. Yu, Y. Xiao, C. Luan, J. Yang, H. Qiao, Y. Wang, X. Zhang, X. Dai, Y. Yang, and H. Zhao. Cobalt/Molybdenum Phosphide and Oxide Heterostructures Encapsulated in N-Doped Carbon Nanocomposite for Overall Water Splitting in Alkaline Media. *ACS Appl. Mater. Interfaces* **2019**, *11*, 6890-6899.
- S9. L. Yan, S. Zhao, Y. Li, B. Zhang, J. Zhu, Z. Liu, X. Yuan, J. Yu, H. Zhang, P. K. Shen. Hierarchical cobalt phosphide hollow nanoboxes as high performance bifunctional electrocatalysts for overall water splitting. *Materials Today Energy*, **2019**, *12*, 443-452.
- S10. W. Xu, S. Zhu, Y. Liang, Z. D. Cui, X. J. Yang and A. Inoue. Nanoporous metal phosphide catalyst for bifunctional water splitting. *J. Mater. Chem. A*, **2018**, *6*, 5574-5579.
- S11. W. Jin, J. Chen, H. Wu, N. Zang, Q. Li, W. Cai, Z. Wu. Interface engineering of oxygen-vacancy-rich  $\text{NiCo}_2\text{O}_4/\text{NiCoP}$  heterostructure as an efficient bifunctional electrocatalyst for overall water splitting. *Catal. Sci. Technol.*, **2020**, *10*, 5559-5565.
- S12. J. Wu, D. Wang, S. Wan, H. Liu, C. Wang, X. Wang. An Efficient Cobalt Phosphide Electrocatalyst Derived from Cobalt Phosphonate Complex for All-pH Hydrogen Evolution Reaction and Overall Water Splitting in Alkaline Solution. *Small* **2019**, 1900550.
- S13. Y. Wu, X. Tao, Y. Qing, H. Xu, F. Yang, S. Luo, C. Tian, M. Liu, and X. Lu. Cr-Doped FeNi-P Nanoparticles Encapsulated into N-Doped Carbon Nanotube as a Robust Bifunctional Catalyst for Efficient Overall Water Splitting. *Adv. Mater.* **2019**, 1900178.
- S14. Q. Wang, H. Zhao, F. Li, W. She, X. Wang, L. Xu and H. Jiao. Mo-doped  $\text{Ni}_2\text{P}$  Hollow Nanostructures: Highly Efficient and Durable Bifunctional Electrocatalysts for Alkaline Water Splitting. *J. Mater. Chem. A*, **2019**, *7*, 7636-7643.
- S15. Z. Ren, X. Ren, L. Zhang, C. Fu, X. Li, Y. Zhang, B. Gao, L. Yang, P. K. Chu, K. Huo. Tungsten-Doped CoP Nanoneedle Arrays Grown on Carbon Cloth as Efficient Bifunctional Electrocatalysts for Overall Water Splitting. *ChemElectroChem* **2019**, *6*, 5229-5236.

- S16. M. Qu, Y. Jiang, M. Yang, S. Liu, Q. Guo, W. Shen, M. Li, R. He. Regulating Electron Density of NiFe-P nanosheets Electrocatalysts by a trifle of Ru for High-efficient Overall Water Splitting. *Applied Catalysis B: Environmental*, **2020**, 263, 118324.
- S17. B. Qiu, A. Han, D. Jiang, T. Wang, P. Du. Cobalt phosphide nanowire arrays on conductive substrate as an efficient bifunctional catalyst for overall water splitting. *ACS Sustainable Chem. Eng.* **2019**, 7, 2, 2360-2369.
- S18. Y. Pei, Y. Ge, H. Chu, W. Smith, P. Dong, P. M. Ajayan, M. Ye, J. Shen. Controlled synthesis of 3D porous structured cobalt-iron based nanosheets by electrodeposition as asymmetric electrodes for ultra-efficient water splitting. *Applied Catalysis B: Environmental*, **2019**, 244, 583-593.
- S19. C. Lv, L. Zhang, X. Huang, Y. Zhu, X. Zhang, J. Hu, S. Lu. Double functionalization of N-doped carbon carved hollow nanocubes with mixed metal phosphides as efficient bifunctional catalysts for electrochemical overall water splitting. *Nano Energy*, **2019**, 65, 103995.
- S20. J. Lin, Y. Yan, C. Li, X. Si, H. Wang, J. Qi, J. Cao, Z. Zhong, W. Fei, J. Feng. Bifunctional Electrocatalysts Based on Mo-Doped NiCoP Nanosheet Arrays for Overall Water Splitting. *Nano-Micro Lett.*, **2019**, 11, 55.
- S21. Y. Lian, H. Sun, X. Wang, P. Qi, Q. Mu, Y. Chen, J. Ye, X. Zhao, Z. Deng, and Y. Peng. Carved nanoframes of cobalt-iron bimetal phosphide as a bifunctional electrocatalyst for efficient overall water splitting. *Chem. Sci.*, **2019**, 10, 464-474.
- S22. G. Hu, J. Xiang, J. Li, P. Liu, R. N. Ali, B. Xiang. Urchin-like ternary cobalt phosphosulfide as high-efficiency and stable bifunctional electrocatalyst for overall water splitting. *Journal of Catalysis*, **2019**, 371, 126-134.
- S23. M. Guo, S. Song, S. Zhang, Y. Yan, K. Zhan, J. Yang, B. Zhao. Fe-Doped Ni-Co Phosphide Nanoplates with Planar Defects as an Efficient Bifunctional Electrocatalyst for Overall Water Splitting. *ACS Sustainable Chem. Eng.* **2020**, 8, 7436-7444.
- S24. K. Liu, C. Zhang, Y. Sun, G. Zhang, X. Shen, F. Zou, H. Zhang, Z. Wu, E. C. Wegener, C. J. Taubert, J. T. Miller, Z. Peng, Y. Zhu. High-Performance Transition Metal Phosphide Alloy Catalyst for Oxygen Evolution Reaction. *ACS Nano*, **2017**, 12, 158-167.
- S25. Q. Kang, M. Li, J. Shi, Q. Lu, F. Gao. A Universal Strategy for Carbon-Supported Transition Metal Phosphides as High-Performance Bifunctional Electrocatalysts towards Efficient Overall Water Splitting. *ACS Appl. Mater. Interfaces* **2020**, 12, 19447-19456.

- S26. Lili Zhang, Tingting Zhang, Kaiqing Dai, Liqing Zhao, Qinghe Wei, Bing Zhang and Xu Xiang. Ultrafine  $\text{Co}_3\text{O}_4$  nanolayer-shelled CoWP nanowire array: a bifunctional electrocatalyst for overall water splitting. *RSC Adv.*, **2020**, 10, 29326.
- S27. Min Yang, Jing-Yi Xie, Zhong-Yuan Lin, Bin Dong, Yue Chen, Xue Ma, Mei-Lian Wen, Ya-Nan Zhou, Lei Wang, Yong-Ming Chai. N-doped FeP nanorods derived from Fe-MOFs as bifunctional electrocatalysts for overall water splitting. *Applied Surface Science*, **2020**, 507, 145096.
- S28. Libin Yang, Honglan Qi, Chengxiao Zhang and Xuping Sun. An efficient bifunctional electrocatalyst for water splitting based on cobalt phosphide. *Nanotechnology*, **2016**, 27, 23LT01.
- S29. Jiang-Yan Xue, Fei-Long Li, Zhong-Yin Zhao, Cong Li, Chun-Yan Ni, Hong-Wei Gu, Pierre Braunstein, Xiao-Qing Huang, and Jian-Ping Lang. Hierarchically-assembled Fe-MoS<sub>2</sub>/Ni<sub>3</sub>S<sub>2</sub>/nickel foam electrocatalyst for efficient water splitting. *Dalton Trans.*, **2019**, 48, 12186-12192.
- S30. Xiao Xu, Xuemin Tian, Zhou Zhong, Longtian Kang, Jiannian Yao. In-situ growth of iron/nickel phosphides hybrid on nickel foam as bifunctional electrocatalyst for overall water splitting. *Journal of Power Sources*, **2019**, 424, 42-51.
- S31. P. Wang, H. He, Z. Pu, L. Chen, C. Zhang, Z. Wang and S. Mu. Phosphorization engineering ameliorated electrocatalytic activity for overall water splitting on Ni<sub>3</sub>S<sub>2</sub> nanosheets. *Dalton Trans.*, **2019**, 48, 13466-13471.
- S32. Miao Wang, Chung-Li Dong, Yu-Cheng Huang, Shaohua Shen. Bifunctional cobalt phosphide nanoparticles with convertible surface structure for efficient electrocatalytic water splitting in alkaline solution. *Journal of Catalysis* **2019**, 371, 262-269.
- S33. K. Wang, K. Sun, T. Yu, X. Liu, G. Wang, L. Jiang and G. Xie. Facile Synthesis of Nanoporous Ni-Fe-P Bifunctional Catalysts with High performance for Overall Water Splitting. *J. Mater. Chem. A*, **2019**, 7, 2518-2523.
- S34. Pengyan Wang, Zonghua Pu, Yanhui Li, Lin Wu, Zhengkai Tu, Min Jiang, Zongkui Kou, Ibrahim Saana Amiinu, and Shichun Mu. Iron-doped nickel phosphide nanosheet arrays: An efficient bifunctional electrocatalyst for water splitting. *ACS Appl. Mater. Interfaces*, **2017**, 9, 26001-26007.

- S35. Luyu Wang, Changdong Gu, Xiang Ge, Jialei Zhang, Hongyi Zhu, and Jiangping Tu. Anchoring  $\text{Ni}_2\text{P}$  Sheets on  $\text{NiCo}_2\text{O}_4$  Nanocone Arrays as Optimized Bifunctional Electrocatalyst for Water Splitting. *Adv. Mater. Interfaces* **2017**, 1700481.
- S36. Jianying Wang, Lvlv Ji, Shangshang Zuo, and Zuofeng Chen. Hierarchically Structured 3D Integrated Electrodes by Galvanic Replacement Reaction for Highly Efficient Water Splitting. *Adv. Energy Mater.* **2017**, 1700107.
- S37. Jinhui Tong, Tao Li, Lili Bo, Wenyan Li, Yuliang Li, and Yi Zhang. Porous Nitrogen Self-Doped Carbon Wrapped Iron Phosphide Hollow Spheres as Efficient Bifunctional Electrocatalysts for Water Splitting. *ChemElectroChem* **2019**, 6, 3437-3444.
- S38. Rong Shi, Jiaxin Wang, Zhi Wang, Tengfei Li, Yu-Fei Song. Unique  $\text{NiFe-NiCoO}_2$  hollow polyhedron as bifunctional electrocatalysts for water splitting. *Journal of Energy Chemistry*, **2019**, 33, 74-80.
- S39. Yan Sang, Xi Cao, Lvxuan Wang, Gaofer Ding, Yingjie Wang, Deshuang Yu, Yanan Hao, Linlin Li, Shengjie Peng. Facile synthesis of three-dimensional spherical  $\text{Ni(OH)}_2/\text{NiCo}_2\text{O}_4$  heterojunctions as efficient bifunctional electrocatalysts for water splitting. *International Journal of Hydrogen Energy*, **2020**, 45, 30601-30610.
- S40. Shuangshuang Ren, Xinde Duan, Fayuan Ge, Mingdao Zhang b, Hegen Zheng. Trimetal-based N-doped carbon nanotubes arrays on Ni foams as self-supported electrodes for hydrogen/oxygen evolution reactions and water splitting. *Journal of Power Sources*, **2020**, 480, 228866.
- S41. S. Peng, L. Li, J. Zhang, T. L. Tan, T. Zhang, J. Dongxiao, X. Han, F. Cheng and S. Ramakrishna. Engineering  $\text{Co}_9\text{S}_8/\text{WS}_2$  array films as bifunctional electrocatalysts for efficient water splitting. *J. Mater. Chem. A*, **2017**, 5, 23361-23368.
- S42. Li Ma, Jiwei Liang, Tian Chen, Yongjie Liu, Songzhan Li, Guojia Fang. 3D  $\text{CuCo}_2\text{S}_4/\text{NiCo}_2\text{S}_4$  core-shell composites as efficient bifunctional electrocatalyst electrodes for overall water splitting. *Electrochimica Acta*, **2019**, 326, 135002.
- S43. Siming Lv, Jianmin Chen, Xiaodong Chen, Junying Chen, and Yingwei Li. Simple 2D/0D CoP Integration in a Metal-Organic Framework derived Bifunctional Electrocatalyst for Efficient Overall Water Splitting. *ChemSusChem*, **2020**, 13, 3495-3503.

- S44. Xijun Liu, Haoxuan Liu, Xianyun Peng, Gaocan Qi, and Jun Luo. Porous Mn-doped FeP/Co<sub>3</sub>(PO<sub>4</sub>)<sub>2</sub> Nanosheet Arrays as an efficient Electrocatalyst for pH-Universal Overall Water Splitting. *ChemSusChem*, **2019**, 12, 1334-1341.
- S45. Tingting Liu, Lisi Xie, Jianhui Yang, Rongmei Kong, Gu Du, Abdullah M. Asiri, Xuping Sun, and Liang Chen. Self-Standing CoP Nanosheets Array: A Three-Dimensional Bifunctional Catalyst Electrode for Overall Water Splitting in both Neutral and Alkaline Media. *ChemElectroChem* **2017**, 4, 1840-1845.
- S46. Yan Li, Mengnan Cui, Tianjiao Li, Yu Shen, Zhenjun Si, Heng-guo Wang. Embedding Co<sub>2</sub>P nanoparticles into co-doped carbon hollow polyhedron as a bifunctional electrocatalyst for efficient overall water splitting. *International Journal of Hydrogen Energy*, **2020**, 45, 16540-16549.
- S47. Shuaishuai Li, Xing Wang, Min Li, Jian Liu, Chaorong Li, Huaping Wu, Daoyou Guo, Fangmin Ye, Shunli Wang, Lin Cheng, Aiping Liu. Self-supported ternary (Ni<sub>x</sub>Fe<sub>y</sub>)<sub>2</sub>P nanoplates arrays as an efficient bifunctional electrocatalyst for overall water splitting. *Electrochimica Acta*, **2019**, 319, 561-568.
- S48. W. Li, G. Cheng, M. Sun, Z. Wu, G. Liu, D. Su, B. Lan, S. Mai, L. Chen and L. Yu. C-CoP hollow microporous nanocages based on the phosphating regulation: a high-performance bifunctional electrocatalyst for overall water splitting. *Nanoscale*, **2019**, 11, 17084-17092.
- S49. Xiao Li, Xinlong Wang, Jie Zhou, Lu Han, Chunyi Sun, Qingqing Wang and Zhongmin Su. Ternary hybrids as efficient bifunctional electrocatalysts derived from bimetallic metal-organic-frameworks for overall water splitting. *J. Mater. Chem. A*, **2018**, 6, 5789.
- S50. Yingjie Li, Haichuan Zhang, Ming Jiang, Yun Kuang, Xiaoming Sun, and Xue Duan. Ternary NiCoP nanosheet arrays: An excellent bifunctional catalyst for alkaline overall water splitting. *Nano Res.* **2016**, 9, 2251-2259.
- S51. Yuanyuan Jiang, Yizhong Lu, Jianyi Lin, Xin Wang, and Zexiang Shen. A Hierarchical MoP Nanoflake Array Supported on Ni Foam: A Bifunctional Electrocatalyst for Overall Water Splitting. *Small Methods* **2018**, 1700369.
- S52. Lvlv Ji, Jianying Wang, Xue Teng, Thomas J. Meyer, and Zuofeng Chen. CoP Nanoframes as Bifunctional Electrocatalysts for Efficient Overall Water Splitting. *ACS Catal.* **2020**, 10, 412-419.

- S53. Xiaowei Hu, Yongheng Yin, Wei Liu, Xingwang Zhang, Hongxiu Zhang. Cobalt phosphide nanocage@ferric-zinc mixed-metal phosphide nanotube hierarchical nanocomposites for enhanced overall water splitting. *Chinese Journal of Catalysis*, **2019**, 40, 1085-1092.
- S54. Lei He, Li Gong, Miao Gao, Chuan-Wang Yang, Guo-Ping Sheng. In situ formation of NiCoP@phosphate nanocages as an efficient bifunctional electrocatalyst for overall water splitting. *Electrochimica Acta*, **2020**, 337, 135799.
- S55. HyukSu Han, Feng Yi, Seunggun Choi, Jungin Kim, Jiseok Kwon, Keemin Park, Taeseup Song. Self-supported vanadium-incorporated cobalt phosphide as a highly efficient bifunctional electrocatalyst for water splitting. *Journal of Alloys and Compounds*, **2020**, 846, 156350.
- S56. Tianqi Yu, Qinglian Xu, Guangfu Qian, Jinli Chen, Hao Zhang, Lin Luo, and Shibin Yin. Amorphous CoO<sub>x</sub>-Decorated Crystalline RuO<sub>2</sub> Nanosheets as Bifunctional Catalysts for Boosting Overall Water Splitting At large Current Density. *ACS Sustainable Chem. Eng.* **2020**, 8, 17520-17526.
- S57. Chen, H.; Song, L.; Ouyang, S.; Wang, J.; Lv, J.; Ye, J. Co and Fe Co-doped WO<sub>2.72</sub> as Alkaline-Solution-Available Oxygen Evolution Reaction Catalyst to Construct Photovoltaic Water Splitting System with Solar-To-Hydrogen Efficiency of 16.9. *Adv. Sci.* **2019**, 6, 1900465.
